# Supplementary material for: Effect of Different Yeast Strains on Biogenic Amines, Volatile Compounds and Sensory Profile of Beer
Source: MDPI journal article supplement (doi:10.3390/foods11152317), 2022-08-03
Supplement: s1 [file s1]

**Table S1.** Volatile compound profile of the beer samples (A – beer fermented with *Saccharomyces cerevisiae* var. *Diastaticus*; B – beer fermented with *Saccharomyces cerevisiae* var. *bayanus*; C – beer fermented with *Brettanomyces clausenii*).

| RT,<br>min | Volatile compounds                           | Beer samples           |               |               |               |               |               |               |               |               |
|------------|----------------------------------------------|------------------------|---------------|---------------|---------------|---------------|---------------|---------------|---------------|---------------|
|            |                                              | A                      |               |               | B             |               |               | C             |               |               |
|            |                                              | Duration of maturation |               |               |               |               |               |               |               |               |
|            |                                              | 1 day                  | 30 days       | 90 days       | 1 day         | 30 days       | 90 days       | 1 day         | 30 days       | 90 days       |
| 34.442     | Ethyl tetradecanoate                         | 0.954 ± 0.084          | 0.536 ± 0.052 | 0.522 ± 0.05  | 0.615 ± 0.104 | 0.365 ± 0.043 | 0.245 ± 0.026 | 0.747 ± 0.139 | 0.32 ± 0.067  | 0.381 ± 0.052 |
| 38.249     | Ethyl 9-hexadecenoate                        | 0.299 ± 0.066          | 0.254 ± 0.024 | 0.56 ± 0.116  | 0.36 ± 0.073  | 0.425 ± 0.044 | 0.957 ± 0.176 | 0.203 ± 0.025 | 0.496 ± 0.083 | 0.656 ± 0.072 |
| 5.686      | 2,3-Butanediol                               | 0.068 ± 0.008          | 0.067 ± 0.015 | 0.056 ± 0.01  | 0.088 ± 0.01  | 0.09 ± 0.011  | 0.072 ± 0.013 | 0.071 ± 0.014 | 0.075 ± 0.008 | 0.069 ± 0.005 |
| 8.363      | 3-methyl-1-Butanol acetate                   | nd                     | nd            | nd            | nd            | nd            | 0.225 ± 0.035 | 0.501 ± 0.048 | 0.44 ± 0.041  | 0.692 ± 0.087 |
| 11.771     | 3-(methylthio)-1-Propanol                    | 0.232 ± 0.039          | 0.182 ± 0.037 | 0.227 ± 0.027 | 0.21 ± 0.03   | 0.179 ± 0.021 | 0.235 ± 0.025 | 0.16 ± 0.012  | 0.02 ± 0.003  | nd            |
| 14.857     | 1-Octanol                                    | 0.096 ± 0.013          | 0.116 ± 0.012 | 0.124 ± 0.018 | 0.042 ± 0.005 | 0.137 ± 0.01  | 0.149 ± 0.019 | 0.114 ± 0.015 | 0.152 ± 0.029 | 0.152 ± 0.019 |
| 16.1       | 2-methylbutylisovalerate                     | 0.195 ± 0.016          | 0.089 ± 0.012 | 0.024 ± 0.003 | 0.241 ± 0.055 | 0.169 ± 0.035 | 0.28 ± 0.024  | 0.273 ± 0.035 | 0.19 ± 0.015  | nd            |
| 17.839     | 4-ethylphenol                                | 0.042 ± 0.008          | 0.047 ± 0.005 | 0.06 ± 0.013  | 0.069 ± 0.014 | 0.078 ± 0.013 | 0.104 ± 0.011 | 0.079 ± 0.01  | 0.081 ± 0.015 | 0.082 ± 0.009 |
| 18.475     | Octanoic acid                                | 0.302 ± 0.047          | 0.474 ± 0.038 | 0.536 ± 0.057 | 0.263 ± 0.059 | 0.313 ± 0.056 | 0.532 ± 0.043 | 0.317 ± 0.038 | 0.276 ± 0.046 | 0.415 ± 0.063 |
| 19.033     | 2-Decanol                                    | 0.153 ± 0.015          | 0.152 ± 0.029 | 0.157 ± 0.024 | 0.17 ± 0.024  | 0.187 ± 0.025 | 0.148 ± 0.013 | 0.235 ± 0.018 | 0.203 ± 0.03  | 0.211 ± 0.039 |
| 20.325     | Benzenecetic acid, ethyl ester               | 0.448 ± 0.042          | 0.433 ± 0.044 | 0.37 ± 0.063  | 0.497 ± 0.051 | 0.492 ± 0.064 | 0.468 ± 0.097 | 0.335 ± 0.044 | 0.544 ± 0.103 | 0.485 ± 0.073 |
| 20.651     | Geraniol                                     | 0.054 ± 0.005          | nd            | nd            | 0.075 ± 0.011 | nd            | nd            | 0.192 ± 0.016 | 0.128 ± 0.02  | 0.113 ± 0.019 |
| 21.027     | Nonanoic acid                                | 0.053 ± 0.008          | 0.07 ± 0.012  | nd            | 0.162 ± 0.031 | 0.194 ± 0.03  | 0.141 ± 0.018 | 0.058 ± 0.009 | 0.076 ± 0.006 | nd            |
| 21.152     | 1-Decanol                                    | 0.051 ± 0.007          | 0.022 ± 0.004 | nd            | 0.175 ± 0.017 | 0.137 ± 0.021 | 0.148 ± 0.033 | 0.189 ± 0.034 | 0.14 ± 0.022  | nd            |
| 21.368     | 4-ethylguaiaicol                             | 0.094 ± 0.01           | 0.114 ± 0.018 | nd            | 0.213 ± 0.039 | 0.212 ± 0.023 | 0.113 ± 0.024 | 0.124 ± 0.028 | 0.14 ± 0.028  | nd            |
| 21.441     | 2-Isopropylidene-5-methylhex-4-enal          | 0.051 ± 0.003          | nd            | nd            | 0.104 ± 0.014 | 0.063 ± 0.008 | 0.119 ± 0.021 | 0.184 ± 0.033 | nd            | nd            |
| 21.862     | Nonanoic acid, ethyl ester                   | 0.312 ± 0.069          | 0.325 ± 0.063 | 0.359 ± 0.044 | 0.438 ± 0.051 | 0.443 ± 0.063 | 0.289 ± 0.043 | 0.264 ± 0.033 | 0.333 ± 0.064 | 0.403 ± 0.053 |
| 22.682     | Geranic acid, methyl ester                   | 0.066 ± 0.006          | 0.112 ± 0.021 | 0.109 ± 0.016 | 0.277 ± 0.037 | 0.342 ± 0.041 | 0.299 ± 0.026 | 0.367 ± 0.049 | 0.521 ± 0.053 | 0.57 ± 0.062  |
| 22.949     | Acetic acid, dec-2-yl ester                  | 0.236 ± 0.027          | 0.054 ± 0.01  | 0.044 ± 0.008 | 0.318 ± 0.027 | 0.112 ± 0.014 | 0.07 ± 0.012  | 0.245 ± 0.039 | 0.136 ± 0.025 | 0.064 ± 0.006 |
| 23.324     | n-Caprylic acid isobutyl ester               | 0.078 ± 0.009          | nd            | nd            | 0.127 ± 0.029 | 0.051 ± 0.009 | 0.061 ± 0.007 | 0.17 ± 0.032  | 0.111 ± 0.022 | nd            |
| 23.662     | Ethyl decanoate                              | 0.441 ± 0.064          | 0.224 ± 0.019 | 0.272 ± 0.036 | 0.208 ± 0.018 | 0.147 ± 0.014 | 0.122 ± 0.016 | 0.245 ± 0.026 | 0.12 ± 0.02   | 0.191 ± 0.026 |
| 23.795     | Dihydro-5-pentyl-2(3H)-Furanone              | 0.114 ± 0.018          | 0.077 ± 0.017 | 0.08 ± 0.015  | 0.096 ± 0.016 | 0.078 ± 0.013 | 0.066 ± 0.006 | 0.083 ± 0.01  | 0.052 ± 0.005 | 0.083 ± 0.01  |
| 24.375     | (Z)-6-(pent-2-enyl)tetrahydro-2H-pyran-2-one | 0.101 ± 0.017          | 0.079 ± 0.009 | 0.079 ± 0.009 | 0.123 ± 0.02  | 0.107 ± 0.014 | 0.064 ± 0.011 | 0.09 ± 0.013  | 0.097 ± 0.012 | 0.05 ± 0.008  |
| 24.822     | Tetradecane                                  | 0.041 ± 0.006          | 0.053 ± 0.009 | 0.066 ± 0.009 | 0.081 ± 0.006 | 0.082 ± 0.013 | 0.113 ± 0.026 | 0.063 ± 0.009 | 0.06 ± 0.007  | 0.085 ± 0.018 |
| 24.965     | Diphenyl ether                               | 0.053 ± 0.005          | 0.024 ± 0.004 | 0.026 ± 0.002 | 0.067 ± 0.016 | 0.041 ± 0.007 | 0.028 ± 0.006 | 0.061 ± 0.007 | 0.034 ± 0.005 | nd            |
| 25.058     | Acetic acid, decyl ester                     | 0.586 ± 0.06           | 0.156 ± 0.02  | 0.088 ± 0.006 | 0.854 ± 0.114 | 0.341 ± 0.067 | 0.133 ± 0.019 | 0.697 ± 0.099 | 0.382 ± 0.047 | 0.14 ± 0.016  |
| 25.252     | (-)-8-p-Menthen-2-yl, acetate, trans         | 0.033 ± 0.005          | 0.062 ± 0.008 | 0.055 ± 0.005 | 0.119 ± 0.019 | 0.109 ± 0.021 | 0.055 ± 0.008 | 0.185 ± 0.026 | 0.152 ± 0.027 | 0.158 ± 0.027 |
| 25.645     | 5-Dodecanol acetate                          | 0.035 ± 0.003          | nd            | nd            | 0.074 ± 0.017 | nd            | nd            | 0.111 ± 0.02  | 0.043 ± 0.004 | 0.099 ± 0.02  |

|        |                                                                                 |               |               |               |               |               |               |               |               |               |
|--------|---------------------------------------------------------------------------------|---------------|---------------|---------------|---------------|---------------|---------------|---------------|---------------|---------------|
| 26.028 | Octanoic acid, 3-methylbutyl ester                                              | 0.183 ± 0.034 | nd            | nd            | 0.542 ± 0.073 | 0.685 ± 0.143 | nd            | 0.608 ± 0.098 | 0.698 ± 0.094 | nd            |
| 26.116 | Octanoic acid, 2-methylbutyl ester                                              | 0.079 ± 0.008 | 0.026 ± 0.002 | 0.124 ± 0.011 | 0.132 ± 0.021 | 0.091 ± 0.013 | 0.18 ± 0.02   | 0.102 ± 0.02  | nd            | nd            |
| 27.202 | Decanoic acid, propyl ester                                                     | 0.06 ± 0.014  | 0.057 ± 0.008 | 0.101 ± 0.022 | 0.095 ± 0.019 | 0.092 ± 0.016 | 0.158 ± 0.027 | 0.088 ± 0.011 | 0.106 ± 0.017 | 0.423 ± 0.05  |
| 27.792 | 2,5-bis(1,1-dimethylethyl)phenol                                                | 0.084 ± 0.014 | 0.127 ± 0.01  | nd            | 0.114 ± 0.015 | 0.209 ± 0.034 | 0.232 ± 0.025 | 0.174 ± 0.027 | nd            | nd            |
| 27.884 | Butylated Hydroxytoluene                                                        | 0.046 ± 0.004 | 0.046 ± 0.004 | 0.051 ± 0.009 | 0.057 ± 0.008 | 0.078 ± 0.015 | 0.105 ± 0.015 | 0.061 ± 0.009 | 0.075 ± 0.01  | 0.082 ± 0.01  |
| 28.236 | δ-cadinene                                                                      | 0.057 ± 0.007 | 0.031 ± 0.003 | 0.055 ± 0.007 | 0.092 ± 0.006 | 0.096 ± 0.011 | 0.09 ± 0.007  | 0.059 ± 0.005 | 0.04 ± 0.006  | 0.065 ± 0.01  |
| 28.458 | Eicosane                                                                        | 0.124 ± 0.018 | nd            | nd            | 0.087 ± 0.012 | 0.104 ± 0.012 | nd            | 0.087 ± 0.01  | 0.04 ± 0.004  | nd            |
| 29.112 | (E)-Nerolidol                                                                   | 0.115 ± 0.013 | nd            | 0.093 ± 0.015 | 0.142 ± 0.011 | 0.124 ± 0.013 | 0.144 ± 0.018 | 0.112 ± 0.018 | 0.132 ± 0.02  | 0.116 ± 0.02  |
| 29.84  | Propanoic acid, 2-methyl-, 1-(1,1-dimethylethyl)-2-methyl-1,3-propanediyl ester | 0.056 ± 0.007 | 0.06 ± 0.006  | 0.058 ± 0.005 | 0.062 ± 0.008 | 0.072 ± 0.011 | 0.125 ± 0.025 | 0.082 ± 0.01  | 0.098 ± 0.014 | 0.101 ± 0.012 |
| 30.332 | Pogostol                                                                        | 0.558 ± 0.088 | 0.399 ± 0.08  | 0.479 ± 0.055 | 0.513 ± 0.037 | 0.449 ± 0.054 | 0.6 ± 0.095   | 0.6 ± 0.093   | 0.36 ± 0.057  | 0.436 ± 0.069 |
| 30.574 | 1,10-Di-ε-cubanol                                                               | 0.04 ± 0.004  | 0.021 ± 0.003 | nd            | 0.048 ± 0.006 | 0.055 ± 0.008 | nd            | 0.089 ± 0.013 | 0.064 ± 0.008 | 0.083 ± 0.014 |
| 31.036 | Pentadecanoic acid, 3-methylbutyl ester                                         | 0.094 ± 0.019 | 0.085 ± 0.005 | nd            | 0.141 ± 0.029 | 0.116 ± 0.011 | 0.11 ± 0.022  | 0.213 ± 0.024 | 0.088 ± 0.016 | nd            |
| 32.002 | Cadalene                                                                        | 0.288 ± 0.046 | 0.188 ± 0.038 | nd            | 0.197 ± 0.02  | 0.302 ± 0.042 | 0.41 ± 0.039  | 0.299 ± 0.049 | 0.426 ± 0.052 | 0.856 ± 0.072 |
| 34.581 | Octadecane                                                                      | 0.156 ± 0.02  | 0.069 ± 0.015 | 0.09 ± 0.02   | 0.099 ± 0.015 | 0.072 ± 0.008 | nd            | 0.14 ± 0.023  | 0.097 ± 0.009 | nd            |
| 35.705 | Octanoic acid, 2-phenylethyl ester                                              | 0.093 ± 0.012 | 0.105 ± 0.009 | 0.078 ± 0.014 | 0.141 ± 0.017 | 0.14 ± 0.023  | 0.109 ± 0.015 | 0.168 ± 0.026 | 0.168 ± 0.027 | 0.162 ± 0.029 |
| 35.892 | Benzoic acid, tridecyl ester                                                    | 0.031 ± 0.004 | 0.017 ± 0.002 | 0.073 ± 0.013 | 0.049 ± 0.006 | 0.031 ± 0.003 | 0.059 ± 0.005 | 0.033 ± 0.005 | nd            | 0.082 ± 0.015 |
| 37.274 | Hexadecanoic acid, methyl ester                                                 | 0.598 ± 0.128 | 0.492 ± 0.076 | 0.578 ± 0.078 | 0.779 ± 0.085 | 0.706 ± 0.097 | 0.539 ± 0.066 | 0.721 ± 0.154 | 0.632 ± 0.124 | 0.709 ± 0.131 |
| 38.659 | Hexadecanoic acid, ethyl ester                                                  | 0.525 ± 0.056 | nd            | nd            | 0.755 ± 0.08  | 0.675 ± 0.126 | nd            | 0.124 ± 0.02  | 0.123 ± 0.023 | nd            |
| 9.677  | methoxy-phenyl-Oxime                                                            | nd            | nd            | nd            | nd            | nd            | nd            | 0.037 ± 0.004 | 0.017 ± 0.003 | nd            |
| 12.033 | Hexanoic acid                                                                   | nd            | 0.291 ± 0.045 |
| 12.932 | Acetic acid, hexyl ester                                                        | 0.017 ± 0.001 | nd            | nd            | 0.02 ± 0.002  | nd            | nd            | 0.033 ± 0.007 | 0.02 ± 0.003  | nd            |
| 15.558 | 2-Nonanone                                                                      | 0.057 ± 0.007 | 0.029 ± 0.003 | 0.024 ± 0.003 | 0.038 ± 0.004 | 0.026 ± 0.003 | nd            | 0.034 ± 0.006 | 0.012 ± 0.002 | nd            |
| 15.825 | β-linalool                                                                      | nd            | nd            | nd            | nd            | nd            | 0.149 ± 0.026 | nd            | nd            | nd            |
| 16.274 | Phenylethyl Alcohol                                                             | nd            | nd            | nd            | nd            | 0.024 ± 0.004 | nd            | nd            | nd            | nd            |
| 17.756 | Ethyl octanoate                                                                 | 0.033 ± 0.005 | 0.025 ± 0.005 | 0.023 ± 0.004 | 0.046 ± 0.008 | 0.03 ± 0.003  | nd            | 0.066 ± 0.011 | 0.035 ± 0.003 | nd            |
| 18.978 | Octanoic acid, ethyl ester                                                      | 0.022 ± 0.003 | nd            | nd            | 0.069 ± 0.004 | nd            | nd            | 0.124 ± 0.022 | 0.059 ± 0.004 | nd            |
| 19.866 | Citronellol                                                                     | 0.014 ± 0.002 | nd            | nd            | 0.01 ± 0.001  | 0.038 ± 0.006 | nd            | 0.027 ± 0.003 | 0.008 ± 0.001 | nd            |
| 20.958 | 2-Undecanol                                                                     | nd            | nd            | nd            | nd            | nd            | nd            | 0.053 ± 0.009 | nd            | nd            |
| 21.79  | 2-Undecanone                                                                    | nd            | nd            | nd            | 0.079 ± 0.014 | nd            | nd            | 0.079 ± 0.008 | 0.086 ± 0.015 | nd            |
| 22.01  | Methyl nonyl carbinol                                                           | nd            | nd            | 0.021 ± 0.003 | nd            | 0.016 ± 0.002 | nd            | nd            | 0.029 ± 0.005 | 0.065 ± 0.011 |
| 22.125 | 1H-2-Indenone,2,4,5,6,7,7a-hexahydro-3-(1-methylethyl)-7a-methyl                | 0.057 ± 0.005 | 0.028 ± 0.004 | nd            | 0.022 ± 0.003 | 0.023 ± 0.005 | nd            | 0.029 ± 0.004 | 0.02 ± 0.002  | nd            |

[illegible]
